# Supplementary material for: DNA damage, nucleolar stress and dysregulated energy metabolism as mechanisms of multimorbidity in cardiovascular disease
Source: bioRxiv or medRxiv preprint supplement (doi:10.1101/2023.02.22.23286318), 2024-01-08
Supplement: Supplementary file [file media-2.pdf]

Figure S1

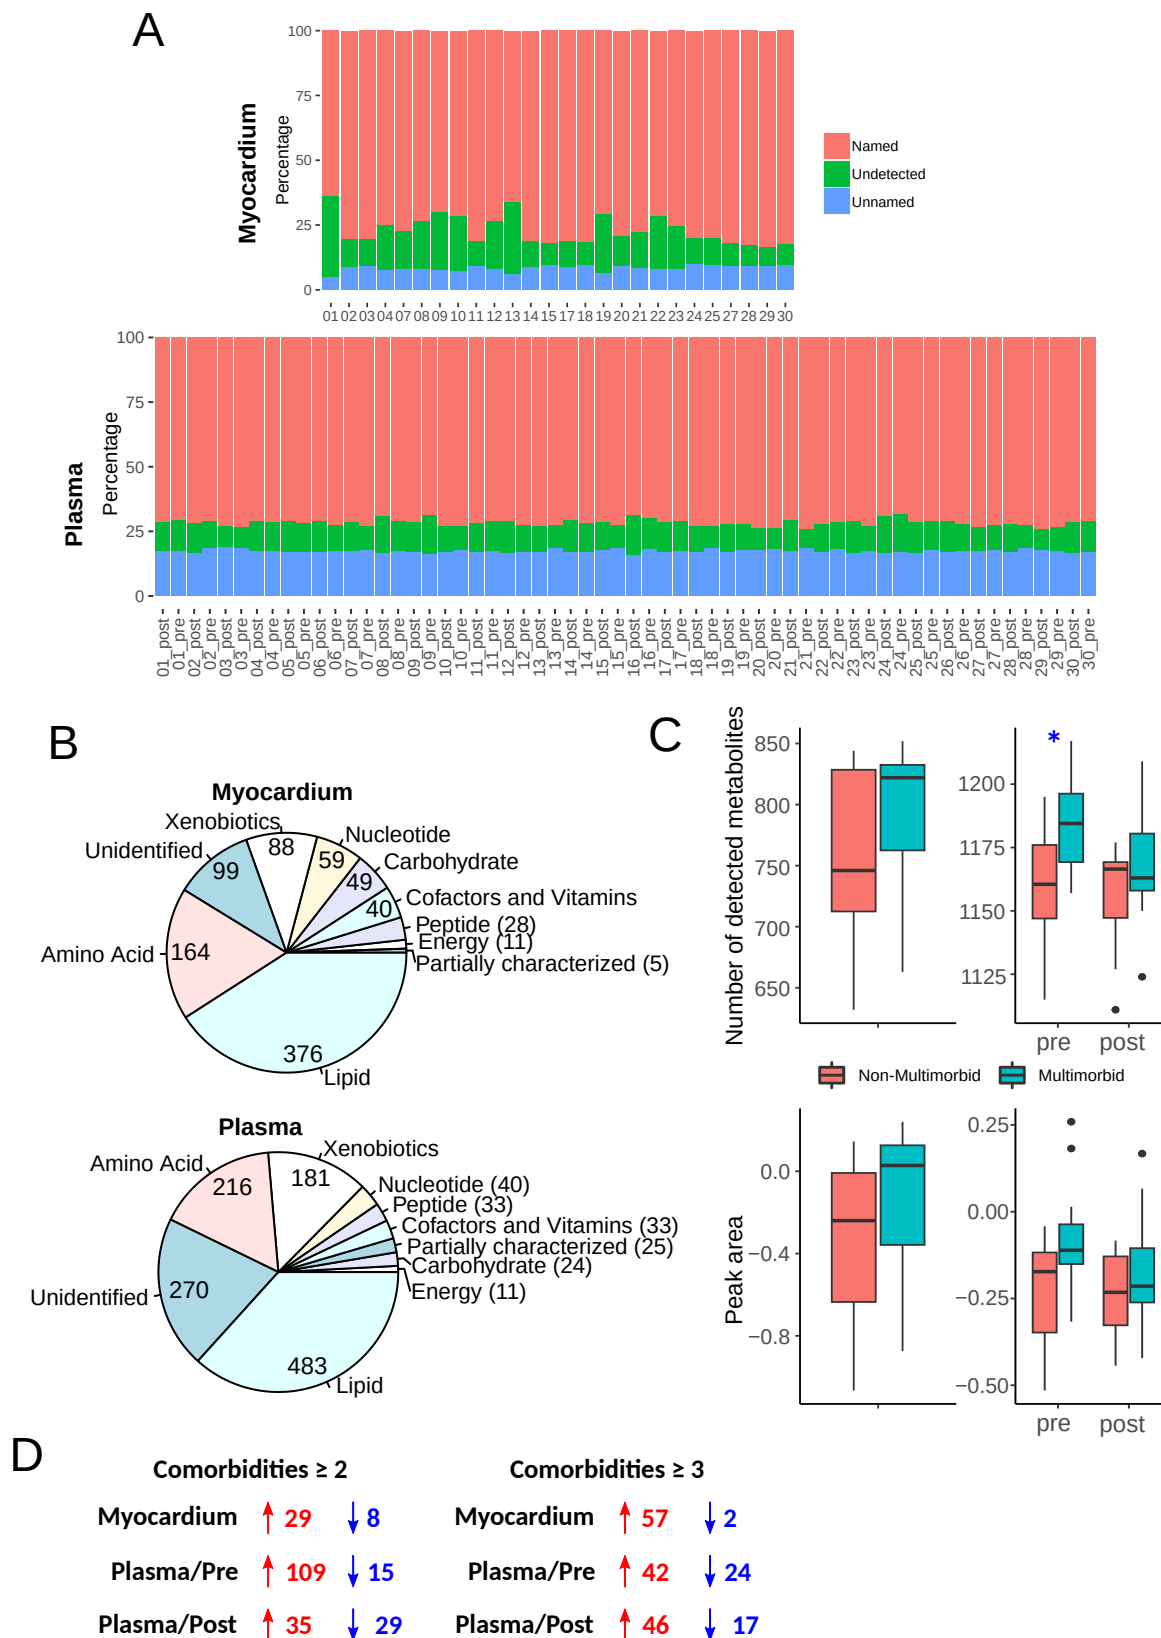

**Figure S1 - Metabolomics summary** A - Distribution of names, unknown and undetected metabolites in all sample types. B - Metabolites biotype distribution in all sample types. C - Comparison of detected metabolite numbers and average peak ratio in all sample types. D - summary of the differential expression analysis.
